# Supplementary material for: Nonconventional diabetes-related care strategies for patients with chronic kidney disease: A scoping review of the literature
Source: PubMed Central journal article supplement — J Comorb. 2019 Mar 1;9:2235042X19831918. doi: 10.1177/2235042X19831918 (PMC6416990; doi:10.1177/2235042x19831918), 2019-03-01

## Supplementary Material

Table 1. Search strategy

Figure 1. Flow diagram of study inclusion and exclusion

**Table 1. Search Strategy**

| <b>CONCEPT 1<br/>(population)</b> | <b>Keywords/Phrases</b>                               | <b>MeSH</b>                                   | <b>EMTREE</b>                                         | <b>Subject Terms</b>                      |
|-----------------------------------|-------------------------------------------------------|-----------------------------------------------|-------------------------------------------------------|-------------------------------------------|
| <b>Diabetes</b>                   | diabetes                                              | <b>exp Diabetes Mellitus/<br/>includes...</b> | <b>exp diabetes mellitus/<br/>includes...</b>         | <b>exp diabetes mellitus/</b>             |
|                                   | diabetic                                              | <i>diabetes mellitus, type 1/</i>             | <i>insulin dependent<br/>diabetes mellitus/</i>       |                                           |
|                                   |                                                       | <i>diabetes mellitus, type 2/</i>             | <i>non-insulin dependent<br/>diabetes mellitus/</i>   |                                           |
|                                   |                                                       |                                               | <b>diabetic patient/</b>                              | <b>diabetic patients/</b>                 |
|                                   |                                                       |                                               |                                                       |                                           |
| <b>AND</b>                        | <b>AND</b>                                            | <b>AND</b>                                    | <b>AND</b>                                            | <b>AND</b>                                |
|                                   |                                                       |                                               |                                                       |                                           |
|                                   |                                                       |                                               |                                                       |                                           |
| <b>Chronic<br/>Kidney Disease</b> | chronic kidney disease/disorder/failure/insufficiency | <b>Renal Insufficiency,<br/>Chronic/</b>      | <b>exp chronic kidney<br/>failure/</b>                | <b>renal insufficiency,<br/>chronic/</b>  |
|                                   | chronic nephropathy                                   | <b>Kidney Failure,<br/>Chronic/</b>           |                                                       | <b>kidney failure, chronic/</b>           |
|                                   | chronic renal disease/disorder/failure/insufficiency  |                                               |                                                       |                                           |
|                                   |                                                       |                                               |                                                       |                                           |
|                                   | renal/blood/extracorporeal/kidney/peritoneal dialysis | <b>renal replacement<br/>therapy/</b>         | <b>exp renal replacement<br/>therapy/ includes...</b> | <b>exp dialysis/</b>                      |
|                                   | h(a)emodialysis                                       | <b>exp renal dialysis/<br/>includes...</b>    | <i>continuous renal<br/>replacement therapy/</i>      | <b>exp renal replacement<br/>therapy/</b> |
|                                   | extracorporeal blood cleansing                        | <i>hemodiafiltration/</i>                     | <i>extended daily dialysis/</i>                       |                                           |
|                                   | h(a)emorenodialysis                                   | <i>hemodialysis, home/</i>                    | <i>hemodiafiltration/</i>                             |                                           |
|                                   | renal replacement/kidney replacement/dialysis therapy | <i>peritoneal dialysis/</i>                   | <i>hemodialysis/</i>                                  |                                           |
|                                   |                                                       |                                               | <i>hemofiltration/</i>                                |                                           |
|                                   |                                                       |                                               | <i>peritoneal dialysis/</i>                           |                                           |

| <b>CONCEPT 2<br/>(Comparison)</b>              | <b>Keywords/Phrases</b>                                       | <b>MeSH</b>                            | <b>EMTREE</b>                                               | <b>Subject Terms</b>                      |
|------------------------------------------------|---------------------------------------------------------------|----------------------------------------|-------------------------------------------------------------|-------------------------------------------|
| <b>"non-traditional" / "non-standard" care</b> | care/therapy/treatment with...                                |                                        |                                                             |                                           |
|                                                | non-traditional                                               |                                        |                                                             |                                           |
|                                                | non-standard                                                  |                                        |                                                             |                                           |
|                                                | novel                                                         |                                        |                                                             |                                           |
|                                                | multifaceted                                                  |                                        |                                                             |                                           |
|                                                | multidisciplinary                                             |                                        |                                                             |                                           |
|                                                | structured                                                    |                                        |                                                             |                                           |
|                                                | integrated management/care                                    | "Delivery of Health Care, Integrated"/ | integrated health care system/                              | Health Care Delivery, Integrated/         |
|                                                | enhanced care                                                 |                                        |                                                             |                                           |
|                                                | mhealth                                                       |                                        |                                                             |                                           |
|                                                | telemedical care                                              | remote consultation/                   | exp telehealth/                                             | exp Telehealth/                           |
|                                                | video consultation* teleconsult*                              | videoconferencing/                     |                                                             |                                           |
|                                                | telehealth/telemedicine/telecommunication/telemonitor*        | telemedicine/                          |                                                             |                                           |
|                                                | mobile technology/app                                         | mobile applications/                   | mobile application/                                         | mobile applications/                      |
|                                                | text messag*                                                  | text messaging/                        | text messaging/                                             |                                           |
|                                                | smartphone*                                                   | smartphone/                            | exp mobile phone/                                           | exp Cellular Phone                        |
|                                                | remote monitor*/consult*                                      | telemonitoring/                        |                                                             |                                           |
|                                                | self-manag*/self-monitor* self-care manag*/self-care monitor* |                                        |                                                             |                                           |
|                                                | diabetes/self-manag*... education                             | exp self care/                         | self care/                                                  | Self Care/ Blood Glucose Self-Monitoring/ |
|                                                | proactive patient outreach                                    | exp counseling/                        |                                                             |                                           |
|                                                | collaborative team/care                                       | exp cognitive therapy/                 | exp cognitive therapy/<br>exp cognitive behavioral therapy/ |                                           |
|                                                | counseling                                                    | behavior therapy/                      | behavior modification/                                      | exp Behavior                              |

|  |                                                  |                         |                                                                                                                                                |                                                                  |
|--|--------------------------------------------------|-------------------------|------------------------------------------------------------------------------------------------------------------------------------------------|------------------------------------------------------------------|
|  |                                                  |                         | behavior therapy/                                                                                                                              | Modification/                                                    |
|  | cognitive behavioral therapy                     | exp health education/   | health education/<br>diabetes education/<br>nutrition education/                                                                               | Health Education/<br>Diabetes Education/<br>Nutrition Education/ |
|  | motivational coaching                            | exp social support/     | social support/<br>psychosocial care/                                                                                                          | Support, Psychosocial/                                           |
|  | patient coaching/counseling/monitoring/education | health education/       | counseling/ e-<br>counseling/ family<br>counseling/ nutritional<br>counseling/ patient<br>counseling/ patient<br>guidance/ peer<br>counseling/ | Counseling/ Peer<br>Counseling/ Nutritional<br>Support/          |
|  | multidisciplinary clinic                         |                         |                                                                                                                                                |                                                                  |
|  | interprofessional team                           | patient participation/  | patient participation/                                                                                                                         | Consumer Participation/                                          |
|  | shared care                                      |                         |                                                                                                                                                |                                                                  |
|  | community based program                          | exp health promotion/   | community program/                                                                                                                             | Community Programs/                                              |
|  | continued care                                   |                         |                                                                                                                                                |                                                                  |
|  | exercise program*/strategy/ies                   | exercise/               | exp physical activity/<br>exp exercise/                                                                                                        | exp Exercise/ Physical<br>Activity/                              |
|  | behavio(u)r change strategy/ies                  | lifestyle modification/ | lifestyle modification/                                                                                                                        | Lifestyle Changes/                                               |
|  | lifestyle intervention                           | exp exercise therapy/   |                                                                                                                                                |                                                                  |
|  | chiroprody/podiatry                              | podiatry/               | podiatry/                                                                                                                                      | Podiatry/                                                        |
|  | diet therapy                                     | exp nutrition therapy/  | exp diet therapy/                                                                                                                              | Diet Therapy/                                                    |

**Figure 1. Flow diagram of study inclusion and exclusion**

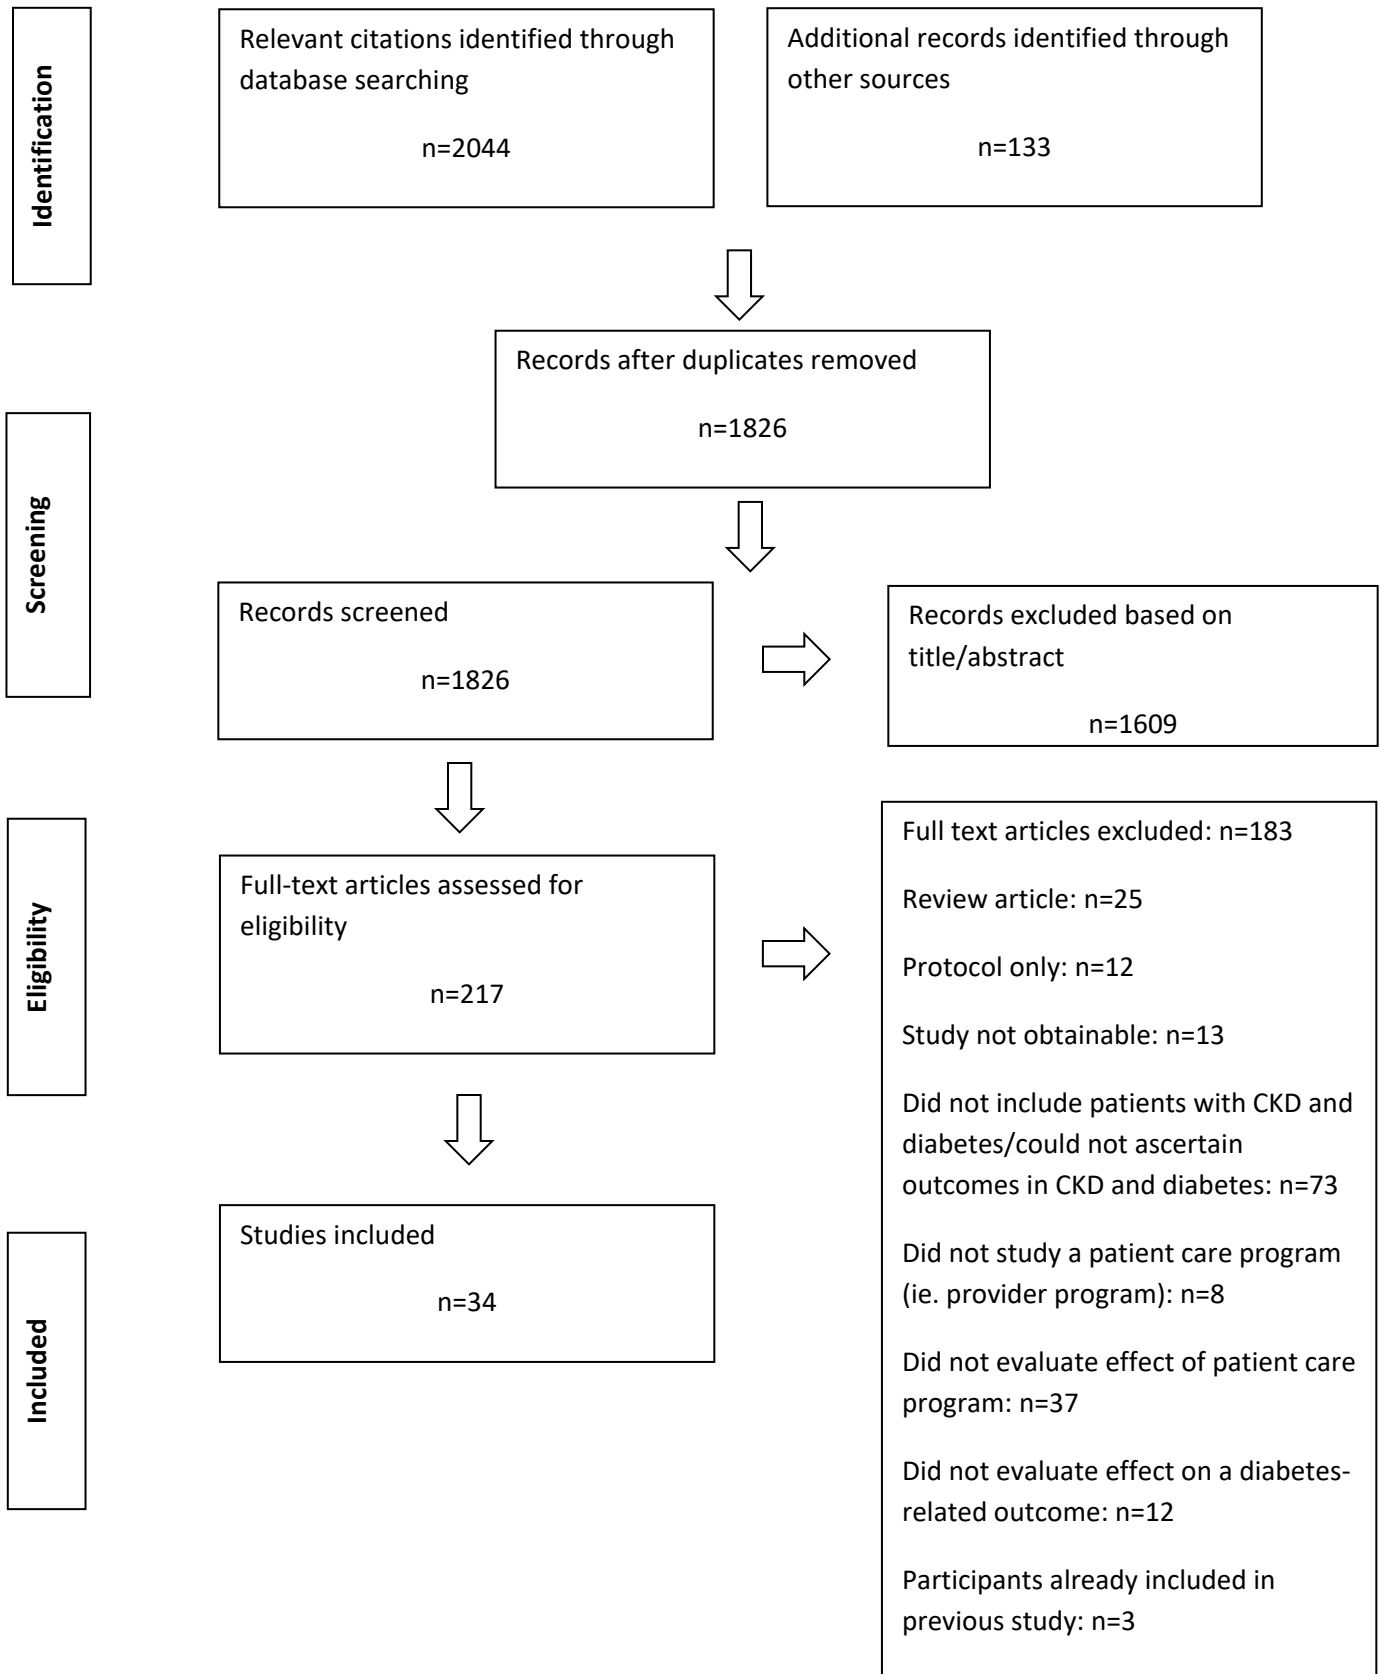

Supplement: Supplementary_Material_JOC.pdf [file Supplementary_Material_JOC.pdf]
